# Supplementary material
Source: PubMed Central journal article supplement (PMC10359794)
Supplement: ejhpharm-2021-002875supp001.pdf [file ejhpharm-2021-002875supp001.pdf]

**Table S1** Pentaxim composition

| <b>The active substances</b>                                                                                                                                   | <b>Quantity</b>        |
|----------------------------------------------------------------------------------------------------------------------------------------------------------------|------------------------|
| <b>After reconstitution one dose (0.5 ml) contains</b>                                                                                                         |                        |
| Diphtheria toxoid <sup>1</sup>                                                                                                                                 | ≥ 30 I.U. <sup>2</sup> |
| Tetanus toxoid <sup>1</sup>                                                                                                                                    | ≥ 40 I.U. <sup>2</sup> |
| <i>Bordetella pertussis</i> antigens:                                                                                                                          |                        |
| Pertussis toxoid <sup>1</sup>                                                                                                                                  | 25 micrograms          |
| Filamentous haemagglutinin <sup>1</sup>                                                                                                                        | 25 micrograms          |
| Inactivated poliomyelitis virus type 1                                                                                                                         | 40 DU <sup>a,b</sup>   |
| Inactivated poliomyelitis virus type 2                                                                                                                         | 8 DU <sup>a,b</sup>    |
| Inactivated poliomyelitis virus type 3                                                                                                                         | 32 DU <sup>a,b</sup>   |
| <i>Haemophilus influenzae</i> type b polysaccharide conjugated to the tetanus protein                                                                          | 10 micrograms          |
| <b>Excipients</b>                                                                                                                                              |                        |
| Sucrose                                                                                                                                                        |                        |
| Tromethamol                                                                                                                                                    |                        |
| Aluminum hydroxide                                                                                                                                             |                        |
| Medium 199 Hanks without phenol red [complex mixture of amino acids (including phenylalanine), mineral salts, vitamins and other components (such as glucose)] |                        |
| Acetic acid and/or sodium hydroxide (for pH adjustment), formaldehyde, phenoxyethanol, water for injections                                                    |                        |

<sup>1</sup> Adsorbed on aluminum hydroxide, hydrated (0.3 mg Al<sup>3+</sup>)

<sup>2</sup> I.U.: International unit

<sup>a</sup> DU: D antigen unit

<sup>b</sup> or equivalent antigenic quantity determined by a suitable immunochemical method
